1 **Tolerance of liver fluke infection varies between breeds and producers in**

2 **Scottish beef cattle**

3

4 Adam D. Hayward, Philip J. Skuce and Tom N. McNeilly

5

6 *Moredun Research Institute, Pentlands Science Park, Bush Loan, Penicuik,*

7 *Midlothian, EH26 0PZ, UK.*

8

9 Corresponding author: Adam Hayward. Email: [adam.hayward@moredun.ac.uk](mailto:adam.hayward@moredun.ac.uk)

10

11 Short title: Variation in tolerance of liver fluke in cattle

12

13

14

15

16

17

18

19

20

21

22

23

24

25

26 **Abstract**

27 Liver fluke (*Fasciola* spp.) are important helminth parasites of livestock globally and  
28 cause significant reductions in health and productivity of beef cattle. Attempts to  
29 control fluke have been thwarted by the difficulty of vaccine design, the evolution of  
30 flukicide resistance, and the need to control the intermediate snail host. Mechanisms  
31 to reduce the impact of parasites on animal performance have typically focused on  
32 promoting host resistance – defined as the ability of the host to kill and remove the  
33 parasite from its system – and such strategies include improving protein nutrition or  
34 selectively breeding for resistance. Organisms, however, have another broad  
35 mechanism for mitigating the impact of parasites: they can show tolerance, defined  
36 as the ability to maintain health or performance under increasing parasite burden.  
37 Tolerance has been studied in the plant literature for over a century, but there are  
38 very few empirical studies of parasite tolerance in livestock. In this study, we used  
39 data collected from >90,000 beef cattle to estimate the impact of the severity of liver  
40 fluke infection on performance and variation in tolerance of fluke. Severity of liver  
41 fluke infection was estimated using liver “fibrosis score” on a scale of 0-3 and  
42 performance estimated as (1) age at slaughter and (2) daily dead weight gain.  
43 Animals with higher fibrosis scores were slaughtered around two weeks later than  
44 animals with no fluke, and gained around 10g less weight per day. There was also  
45 considerable variation in these effects of fibrosis score, such that animals from  
46 different producers and breeds varied in their tolerance of fluke infection. While  
47 breeds did not vary in the association between fibrosis and age at slaughter, there  
48 was considerable variation among producers: high fibrosis score delayed slaughter  
49 by up to 50 days in some producers, but not at all in others. Meanwhile, there was  
50 support for variation in the slope of daily dead weight gain on fibrosis score among

51 both breeds and producers, with some unaffected by high fluke scores and some  
52 breeds and producers experiencing a 20g/day lower weight gain under high fluke  
53 scores. Our results point to the potential for both environmental and genetic variation  
54 in tolerance of liver fluke in cattle, paving the way for quantitative genetic and  
55 nutritional research into the feasibility of promoting tolerance as a disease mitigation  
56 strategy.

57

58 **Keywords:** Liver fluke; *Fasciola* spp.; tolerance; disease; productivity

59

## 60 **Implications**

61 Promoting tolerance of disease could help mitigate the impact of disease on  
62 livestock productivity, but little research has explored variation in tolerance of  
63 livestock diseases or the possibility of promoting tolerance as a mitigation strategy.  
64 We used abattoir data to demonstrate that beef cattle vary in their tolerance of fluke  
65 infection: while animals from some breeds and some producers experience no  
66 impact of fluke on production, others show a large negative effect. Thus, promoting  
67 tolerance through management and/or selective breeding could offer a means of  
68 reducing the impact of liver fluke on cattle performance.

69

70

71

72

73

74

75

76 **Introduction**

77

78 Liver flukes (*Fasciola* spp.) are among the most important helminth parasites of  
79 domestic sheep and cattle worldwide, causing large financial losses (Schweizer, *et*  
80 *al.*, 2005) as a result of reduced weight gain (Genicot, *et al.*, 1991), milk yield (May,  
81 *et al.*, 2020), and fertility (May, *et al.*, 2019). Control of liver fluke is difficult, with no  
82 commercially viable vaccine yet developed (Molina-Hernández, *et al.*, 2015),  
83 increasing resistance to common flukicides (Kamaludeen, *et al.*, 2019), and the  
84 necessity of considering the biology of the mud snail (*Galba truncatula*) intermediate  
85 host in which clonal amplification of the parasite occurs (Beesley, *et al.*, 2018). As  
86 such, novel control strategies are likely to be needed in the relatively near future.

87

88 Infected hosts have two broad strategies for mitigating the impact of infection upon  
89 their health and fitness. One is resistance to infection, defined as the ability of the  
90 host to reduce the establishment rate of the parasite and kill and/or remove it from its  
91 system (Råberg, *et al.*, 2009). Measuring resistance in individual animals is generally  
92 straightforward and usually focuses on a measure of infection burden such as  
93 helminth faecal egg count (FEC) and other measures of pathogen load, or  
94 quantifying pathogen-specific antibody responses. Individuals, genotypes, or breeds  
95 with lower pathogen burden or higher antibody levels are generally defined as more  
96 resistant. Such measures have been shown to have a considerable heritable  
97 component for gastrointestinal nematodes and consequently, breeding for resistance  
98 is possible and has been widely implemented with success (Bishop, 2012b). It is  
99 clear, however, that potential trade-offs exist between resistance and production  
100 traits (Rauw, *et al.*, 1998), and enhanced resistance may potentially result in the

101 evolution of counter-measures by the parasite, leading to evasion of host resistance  
102 mechanisms, enhanced reproductive rate, or increased parasite virulence (Rausher,  
103 2001).

104

105 A second defence mechanism, which has received considerably less attention in the  
106 veterinary literature, is tolerance of infection, defined as the ability of the host to  
107 maintain health or fitness as parasite burden increases (Råberg, *et al.*, 2009). This is  
108 quite distinct from resilience to infection, defined as the ability of a host to thrive  
109 when infected (Bishop, 2012a), which is actually a product of both resistance and  
110 tolerance; indeed many studies purporting to study tolerance are in fact studying  
111 resilience (Sakkas, *et al.*, 2018). Tolerance has been exceptionally well-studied in  
112 the plant literature (Fineblum and Rausher, 1995), with the term being coined to refer  
113 to an ability to cope with disease over a century ago (Cobb, 1894). The statistical  
114 framework for studying variation in tolerance as “reaction norms” – i.e. variation  
115 between groups or genotypes in the rate of change of health or fitness as a function  
116 of parasite burden – was also developed in the plant literature (Simms, 2000).

117 Variation in tolerance of vertebrates to pathogens has been more recently  
118 demonstrated in both laboratory (Råberg, *et al.*, 2007) and wild animal populations  
119 (Hayward, *et al.*, 2014; Knutie, *et al.*, 2017). The benefits of promoting or selecting  
120 for tolerance are recognised in the veterinary literature (Bishop, 2012a) and the  
121 statistical framework has been described (Doeschl-Wilson, *et al.*, 2012), but little  
122 empirical work has been undertaken to quantify tolerance variation or explain it in a  
123 veterinary setting. A notable exception is tolerance of Porcine Reproductive and  
124 Respiratory Syndrome Virus (PRRSV) in pigs, where variation in tolerance has been

125 demonstrated and a candidate tolerance locus identified (Lough, *et al.*, 2017; Lough,  
126 *et al.*, 2018).

127

128 Tolerance is most likely to be an important defence mechanism where the parasite is  
129 prevalent and resistance is relatively low (Bishop, 2012a), a description which fits the  
130 case of liver fluke in cattle. The development of drug resistance in pathogens is  
131 inevitable, meaning that other strategies are require for effective control. Promoting  
132 tolerance – as opposed to resistance – could be fruitful because tolerance minimizes  
133 the evolutionary counter-response from the parasite (Rausher, 2001). The first steps  
134 towards designing tolerance-boosting therapies will be quantifying variation in  
135 tolerance and identifying its drivers (Vale, *et al.*, 2016). Here, we use data collected  
136 from slaughtered cattle and use random regression modelling to estimate variation in  
137 tolerance as a measure of liver fluke infection between breeds and producers. Our  
138 results demonstrate the potential for both genetic and environmental factors to drive  
139 variation in tolerance of this important parasite.

140

## 141 **Materials and methods**

142

### 143 *Data*

144

145 The data used in this study were provided by Scotbeef Ltd., Scotland's largest red  
146 meat producers, and were collected between February 2<sup>nd</sup> 2018 and February 1<sup>st</sup>  
147 2019. This routinely-collected dataset included information on the identity of the  
148 producer, and the breed, sex, date of birth and age at slaughter (in days) of each  
149 animal. Carcass data collected included weight, grading, conformation score,

150 fatness; daily dead weight gain was calculated as carcass weight divided by age at  
151 slaughter in days. There were also data on whether or not each animal had received  
152 a treatment for liver fluke, and the date that the treatment was administered,  
153 although information on the product, active compound and dose rate were not  
154 available. Livers were inspected for liver fibrosis and assigned a score between 0 (no  
155 evidence of fibrosis) and 3 (severe fibrosis), described recently as a proxy for the  
156 severity of liver fluke infection (Mazeri, *et al.*, 2017). The full dataset consisted of  
157 92,119 animals from 141 breeds and 884 producers.

158

### 159 *Statistical analysis*

160

161 First, we assessed the overall association between liver fibrosis and two  
162 performance traits that were analysed separately: age at slaughter and daily dead  
163 weight gain. For each trait, we fitted linear mixed-effects models using the R  
164 package ‘glmmTMB’ (Brooks, *et al.*, 2017) with breed and producer as random  
165 effects and the sex of the animal, whether or not it had been treated for liver fluke,  
166 and liver fibrosis score as fixed categorical variables. We compared this model to a  
167 model without fibrosis score using a likelihood ratio test (LRT) in order to determine  
168 whether fibrosis score was significantly associated with performance. Once missing  
169 values were removed, we analysed 91,683 animals from 113 breeds and 875  
170 producers for age at slaughter, and 92,058 animals from 114 breeds and 884  
171 producers for daily dead weight gain.

172

173 Next, we assessed whether the change in performance with fibrosis score varied  
174 between breeds and/or producers by applying a “reaction norm” approach using

175 random regression models. The approach works on the basis that tolerance is  
176 measured as the slope of some measure of performance on disease burden, and  
177 testing for variation between groups or individuals in that slope (Simms, 2000;  
178 Doeschl-Wilson, *et al.*, 2012). For each trait, we first fitted a LMM in 'glmmTMB' with  
179 breed and producer as random effects, sex and fluke treatment as categorical fixed  
180 effects, and fibrosis score as a continuous fixed effect, standardized to be between -  
181 1 and +1 (model 1). We then fitted models of the same structure, but with  
182 interactions between standardized fibrosis score and the random effects of breed  
183 (model 2) or producer (model 3) or both breed and producer (model 4). We tested  
184 the significance of the random slope terms by comparing model 2 and 3 with model  
185 1, and by comparing model 4 with models 2 and 3 using LRTs.

186

## 187 **Results**

188

189 Fibrosis score was significantly associated with age at slaughter, with animals with  
190 scores of 1, 2, and 3 taking  $13.05 \pm 1.82SE$ ,  $16.86 \pm 2.18$  and  $14.58 \pm 2.15$  more days,  
191 respectively, to reach slaughter weight than animals with a fibrosis score of 0 (LRT:  
192  $\chi^2=215.29$ ,  $DF=3$ ,  $p<0.001$ ; Figure 1A). Males were slaughtered around a week  
193 earlier than females (estimate =  $-6.79 \pm 0.85$ ,  $\chi^2=63.09$ ,  $DF=1$ ,  $p<0.001$ ) and animals  
194 that had ever received a fluke treatment took around 3 weeks longer to reach  
195 slaughter (estimate =  $22.64 \pm 1.82$ ,  $\chi^2=154.04$ ,  $DF=1$ ,  $p<0.001$ ). Similarly, a non-zero  
196 fibrosis score was associated with lower daily dead weight gain, with animals with  
197 fibrosis scores of 1, 2 and 3 gaining  $-10.0 \pm 0.8SE$ ,  $-12.5 \pm 1.6$  and  $-10.1 \pm 1.6$  fewer  
198 grams per day, respectively (LRT:  $\chi^2=214.81$ ,  $DF=3$ ,  $p<0.001$ ; Figure 1B). Males had  
199 greater daily dead weight gain than females (estimate =  $59.5 \pm 0.6g/day$ ,  $\chi^2=8139.8$ ,



200 DF=1,  $p < 0.001$ ) and animals that had been treated for fluke gained less weight per  
201 day (estimate =  $-14.0 \pm 1.4$ g/day,  $\chi^2 = 102.46$ , DF=1,  $p < 0.001$ ).

202

203 The results of the random regression models for age at slaughter are shown in Table  
204 1. There was no support for a random slope of breed-by-fibrosis (model 2; Figure  
205 2A), but there was evidence to support variation in the slope of age at slaughter on  
206 fibrosis between producers (model 3; Figure 2C), which held in the presence of the  
207 random slope of breed-by-fibrosis (compare model 4 to model 2). The average  
208 estimated delay in age at slaughter between an animal with a fibrosis score of 3  
209 compared to a fibrosis score of 0 was approximately 18 days; while there was little  
210 variation around this between breeds (Figure 2B), there was substantially more  
211 among producers (Figure 2D), with some producers showing negligible differences in  
212 age at slaughter with increasing fibrosis score, and others showing a delay of 50 or  
213 even 60 days.

214

215 The results of the random regression models for daily dead weight gain are shown in  
216 Table 2. There was some support for a random slope of breed-by-fibrosis score  
217 (model 2; Figure 3A) and stronger support for a random slope of producer-by-fibrosis  
218 score (model 3; Figure 3C). However, while the random slope of producer held in the  
219 presence of the random slope of breed (compare model 4 with model 2), the  
220 converse was not true (compare model 4 with model 3), suggesting that variation in  
221 tolerance of fibrosis was more robust among producers than breeds. While the  
222 model-estimated average reduction in daily dead weight gain between an animal  
223 with a fibrosis score of 3 compared to a fibrosis score of 0 was 0.010kg/day, some  
224 breeds and producers showed a difference of zero and hence no effect of fibrosis.

225 Meanwhile, some breeds with fibrosis scores of 3 had a difference of up to -  
226 0.020kg/day while some animals from some producers with a fibrosis score of 3 had  
227 a difference of up to -0.040kg/day.

228

## 229 **Discussion**

230

231 The results of this study demonstrate the negative impact that liver fluke may have  
232 on weight gain in beef cattle resulting in a later age at slaughter. Specifically, we  
233 found that cattle with non-zero fibrosis scores gained approximately 10g less per  
234 day, and took approximately 2 weeks longer to reach slaughter weight. Previous  
235 studies have found similar effects of fluke infection on daily weight gain in beef cattle,  
236 although most have used data from experimental infections. These effects range  
237 from negligible (Echevarria, *et al.*, 1992) to substantial effects of a 0.1kg/day  
238 difference between infected and uninfected animals (Jacob, *et al.*, 2015) and a  
239 difference of 0.7kg/day in Belgian Blue bulls experimentally infected on a feedlot  
240 (Genicot, *et al.*, 1991). Meanwhile, a previous study using data from the same  
241 abattoir as used in the present study – albeit with a smaller sample size of 619 cattle  
242 – found substantial effects of fluke infection, with animals with fibrosis scores of 1, 2  
243 and 3 taking on average 34, 93, and 78 days longer to reach slaughter weight,  
244 respectively (Mazeri, *et al.*, 2017). Most abattoir studies on the impact of fluke in  
245 cattle have focused on carcass weight as the performance parameter of interest  
246 (Sanchez-Vazquez and Lewis, 2013; Bellet, *et al.*, 2016; da Costa, *et al.*, 2019), and  
247 in these cases differences, while statistically significant, tend to be relatively small,  
248 presumably because animals are only sent to slaughter when they reach the  
249 requisite target weight.

250

251 We then went on to examine whether the linear association between both  
252 performance parameters and fibrosis score – our measure of tolerance – varied  
253 between breeds and producers. While we did not find variation between breeds in  
254 when tolerance was defined in terms of age at slaughter, we did find some support  
255 when tolerance was defined by daily dead weight gain. This offers the possibility that  
256 genetic variation for tolerance exists, at least at the among-breed level, with some  
257 breeds seemingly unaffected by an increasing fibrosis score, and others having  
258 considerably lower weight gain. Breeding to mitigate the impact of disease has  
259 largely focused on promoting resistance to infection, but the advantages of breeding  
260 for tolerance to disease in livestock have also been expounded (Bishop, 2012a;  
261 Doeschl-Wilson, *et al.*, 2012). These include the fact that tolerance is unlikely to  
262 select for pathogens that are better able to evade host resistance (Rausher, 2001;  
263 Lough, *et al.*, 2017) and that tolerance mechanisms may be general and so offer  
264 cross-tolerance to other pathogens (Lough, *et al.*, 2017). Further, promoting  
265 tolerance is suggested to be potentially advantageous when pathogen prevalence is  
266 high, resistance is generally low and elimination has proven difficult due to  
267 pathogens evolving in response to treatments (Bishop, 2012a), conditions that apply  
268 to liver fluke and gastrointestinal nematodes

269

270 We found stronger evidence for variation in tolerance between producers, with stark  
271 differences between producers in the effect of fibrosis on both age at slaughter and  
272 daily dead weight gain. Such variation could be partly explained by producers rearing  
273 different cattle genotypes even within the same breeds, but could be accounted for  
274 by a large number of other factors, such as variation in the conditions under which

275 animals are kept (Nakov, *et al.*, 2019). Indeed, studies in both wild and lab  
276 populations of animals have found variation in tolerance of infection due to variation  
277 in diet, including Monarch butterflies (*Danaus plexippus*) feeding on different species  
278 of milkweed (Sternberg, *et al.*, 2012), BALB/c mice fed on diets of varying protein  
279 composition (Clough, *et al.*, 2016) and Cuban tree frogs (*Osteopilus septentrionalis*)  
280 fed on different resource diets (Knutie, *et al.*, 2017). If variation in housing conditions,  
281 diet or other management practices are associated with variation in tolerance, it  
282 potentially offers a feasible avenue for mitigation of the impacts of fluke infection,  
283 although identifying the important factors may be difficult. There is also likely to be  
284 variation between fluke genotypes in their life-history traits and virulence  
285 (Fairweather, 2011), and so it may be the case that variation in the parasite is largely  
286 responsible for the observed variation.

287

288 Two further caveats are apparent when considering our results. The first is that,  
289 although liver fibrosis score may be a reasonable proxy for fluke burden (Mazeri, *et*  
290 *al.*, 2016), it is relatively low resolution, is subjective, and does not distinguish  
291 between active and historic infection. Furthermore, liver inspection was shown to be  
292 the least effective method out of the five tested at identifying active fluke infection  
293 (Mazeri, *et al.*, 2016). Nevertheless, the fibrosis score does offer a relatively rapid  
294 assessment of fluke infection with some quantitative value on the processing line.  
295 The second apparent caveat is that, although the association between fibrosis score  
296 and performance in the population as a whole was not linear (**Figure 1**), we imposed  
297 a linear association in our random regression models.

298

299 In summary, our results show evidence for striking variation both between breeds  
300 and producers in their tolerance of a measure of liver fluke burden, offering the  
301 possibility of both genetic and environmental variation in tolerance of an important  
302 parasite of livestock. Future studies should build on these results in a number of  
303 ways. First, studies should aim to use methods – or study parasite species – that  
304 enable more reliable estimation of parasite burden in live animals. This will enable,  
305 second, repeated measures of parasite burden and performance in the same animal,  
306 allowing the estimation of between-individual variation in tolerance. This will  
307 facilitate, third, the use of pedigree-based or other methods to estimate genetic  
308 variation in tolerance of infection. Once this has been established, potential  
309 mechanisms of tolerance variation may be explored. Improved understanding of  
310 tolerance could offer new avenues for mitigating the impact of disease on  
311 performance (Vale, *et al.*, 2016), potentially including genetic improvement programs  
312 or adopting management, environmental or nutritional programs that boost animal  
313 tolerance.

314

### 315 **Acknowledgements**

316

317 The authors would like to thank Scotbeef Ltd for providing data, and particularly  
318 Suzie England, Uel Morton, William Rowe, Eck Gordon and Sheena Mather. ADH is  
319 funded by a Moredun Foundation Research Fellowship. PJS and TNMcN receive  
320 funding from the Scottish Government Rural Affairs, Food and the Environment  
321 (RAFE) Strategic Research Portfolio 2016-2021.

322

### 323 **Declaration of interest**

324 The authors declare no conflict of interest

325

### 326 **Ethics statement**

327 Ethics committee approval was not obtained for this study as the data were obtained  
328 from an existing database maintained by Scotbeef Ltd.

329

### 330 **Software and data repository resources**

331 The data are owned by Scotbeef Ltd and as such have not been deposited in an  
332 official repository.

333

### 334 **References**

335

336 Beesley NJ, Caminade C, Charlier J, Flynn RJ, Hodgkinson JE, Martinez-Moreno A,  
337 Martinez-Valladares M, Perez J, Rinaldi L and Williams DJL 2018. *Fasciola* and fasciolosis  
338 in ruminants in Europe: Identifying research needs. *Transboundary and Emerging Diseases*  
339 65, 199-216. doi: 10.1111/tbed.12682.

340

341 Bellet C, Green MJ, Vickers M, Forbes A, Berry E and Kaler J 2016. *Ostertagia* spp., rumen  
342 fluke and liver fluke single- and poly-infections in cattle: An abattoir study of prevalence and  
343 production impacts in England and Wales. *Preventive Veterinary Medicine* 132, 98-106. doi:  
344 <https://doi.org/10.1016/j.prevetmed.2016.08.010>.

345

346 Bishop S 2012a. A consideration of resistance and tolerance for ruminant nematode  
347 infections. *Frontiers in Genetics* 3, 168. doi: 10.3389/fgene.2012.00168.

348

349 Bishop SC 2012b. Possibilities to breed for resistance to nematode parasite infections in  
350 small ruminants in tropical production systems. *animal* 6, 741-747. doi:  
351 doi:10.1017/S1751731111000681.

352

353 Brooks ME, Kristensen K, Benthem KJv, Magnusson A, Berg CW, Nielsen A, Skaug HJ,  
354 Mächler M and Bolker BM 2017. glmmTMB balances speed and flexibility among packages  
355 for zero-inflated Generalized Linear Mixed Modeling. *The R Journal* 9, 378-400. doi:

356

357 Clough D, Prykhodko O and Råberg L 2016. Effects of protein malnutrition on tolerance to  
358 helminth infection. *Biology Letters* 12, 20160189. doi: 10.1098/rsbl.2016.0189.

359

360 Cobb NA 1894. Contributions to an economic knowledge of Australian rusts (Uredineae).  
361 *Agriculture Gazette NSW* 5, 239-250. doi:

362

363 da Costa RA, Corbellini LG, Castro-Janer E and Riet-Correa F 2019. Evaluation of losses in  
364 carcasses of cattle naturally infected with *Fasciola hepatica*: effects on weight by age range  
365 and on carcass quality parameters. *International Journal for Parasitology* 49, 867-872. doi:  
366 <https://doi.org/10.1016/j.ijpara.2019.06.005>.

367

368 Doeschl-Wilson AB, Villanueva B and Kyriazakis I 2012. The first step towards genetic  
369 selection for host tolerance to infectious pathogens: obtaining the tolerance phenotype  
370 through group estimates. *Frontiers in Genetics* 3, 265. doi: 10.3389/fgene.2012.00265.

371

372 Echevarria FAM, Correa MBC, Wehrle RD and Correa IF 1992. Experiments on anthelmintic  
373 control of *Fasciola hepatica* in Brazil. *Veterinary Parasitology* 43, 211-222. doi:  
374 [https://doi.org/10.1016/0304-4017\(92\)90162-3](https://doi.org/10.1016/0304-4017(92)90162-3).

375

376 Fairweather I 2011. Liver fluke isolates: a question of provenance. *Veterinary Parasitology*  
377 176, 1-8. doi: <https://doi.org/10.1016/j.vetpar.2010.12.011>.

378

379 Fineblum WL and Rausher MD 1995. Tradeoff between resistance and tolerance to  
380 herbivore damage in a morning glory. *Nature* 377, 517-520. doi: 10.1038/377517a0.

381

382 Genicot B, Mouligneau F and Lekeux P 1991. Economic and production consequences of  
383 liver fluke disease in double-muscled fattening cattle. *Journal of Veterinary Medicine, Series*  
384 B 38, 203-208. doi: 10.1111/j.1439-0450.1991.tb00862.x.

385

386 Hayward AD, Nussey DH, Wilson AJ, Berenos C, Pilkington JG, Watt KA, Pemberton JM  
387 and Graham AL 2014. Natural selection on individual variation in tolerance of gastrointestinal  
388 nematode infection. *PLoS Biology* 12, e1001917. doi: 10.1371/journal.pbio.1001917.

389

390 Jacob AB, Singh P and Verma AK 2015. Effect of feeding deoiled mahua (*Bassia latifolia*)  
391 seed cake on the growth performance, digestibility and balance of nutrients in cross-bred  
392 calves during pre-patent period of *Fasciola gigantica* infection. *Journal of Animal Physiology*  
393 and Animal Nutrition 99, 299-307. doi: 10.1111/jpn.12231.

394

395 Kamaludeen J, Graham-Brown J, Stephens N, Miller J, Howell A, Beesley NJ, Hodgkinson J,  
396 Learmount J and Williams D 2019. Lack of efficacy of triclabendazole against *Fasciola*  
397 *hepatica* is present on sheep farms in three regions of England, and Wales. *Veterinary*  
398 Record 184, 502-502. doi: 10.1136/vr.105209.

399



400 Knutie SA, Wilkinson CL, Wu QC, Ortega CN and Rohr JR 2017. Host resistance and  
401 tolerance of parasitic gut worms depend on resource availability. *Oecologia* 183, 1031-1040.  
402 doi: [10.1007/s00442-017-3822-7](https://doi.org/10.1007/s00442-017-3822-7).

403

404 Lough G, Rashidi H, Kyriazakis I, Dekkers JCM, Hess A, Hess M, Deeb N, Kause A, Lunney  
405 JK, Rowland RRR, Mulder HA and Doeschl-Wilson A 2017. Use of multi-trait and random  
406 regression models to identify genetic variation in tolerance to porcine reproductive and  
407 respiratory syndrome virus. *Genetics Selection Evolution* 49, 37. doi: [10.1186/s12711-017-](https://doi.org/10.1186/s12711-017-0312-7)  
408 [0312-7](https://doi.org/10.1186/s12711-017-0312-7).

409

410 Lough G, Hess A, Hess M, Rashidi H, Matika O, Lunney JK, Rowland RRR, Kyriazakis I,  
411 Mulder HA, Dekkers JCM and Doeschl-Wilson A 2018. Harnessing longitudinal information  
412 to identify genetic variation in tolerance of pigs to Porcine Reproductive and Respiratory  
413 Syndrome virus infection. *Genetics Selection Evolution* 50, 50. doi: [10.1186/s12711-018-](https://doi.org/10.1186/s12711-018-0420-z)  
414 [0420-z](https://doi.org/10.1186/s12711-018-0420-z).

415

416 May K, Brügemann K, König S and Strube C 2019. Patent infections with *Fasciola hepatica*  
417 and paramphistomes (*Calicophoron daubneyi*) in dairy cows and association of fasciolosis  
418 with individual milk production and fertility parameters. *Veterinary Parasitology* 267, 32-41.  
419 doi: <https://doi.org/10.1016/j.vetpar.2019.01.012>.

420

421 May K, Bohlsen E, König S and Strube C 2020. *Fasciola hepatica* seroprevalence in  
422 Northern German dairy herds and associations with milk production parameters and milk  
423 ketone bodies. *Veterinary Parasitology* 277, 109016. doi:  
424 <https://doi.org/10.1016/j.vetpar.2019.109016>.

425

426 Mazeri S, Sargison N, Kelly RF, Bronsvort BMd and Handel I 2016. Evaluation of the  
427 performance of five diagnostic tests for *Fasciola hepatica* infection in naturally infected cattle  
428 using a Bayesian no gold standard approach. PLOS ONE 11, e0161621. doi:  
429 10.1371/journal.pone.0161621.

430

431 Mazeri S, Rydevik G, Handel I, Bronsvort BMd and Sargison N 2017. Estimation of the  
432 impact of *Fasciola hepatica* infection on time taken for UK beef cattle to reach slaughter  
433 weight. Scientific Reports 7, 7319. doi: 10.1038/s41598-017-07396-1.

434

435 Molina-Hernández V, Mulcahy G, Pérez J, Martínez-Moreno Á, Donnelly S, O'Neill SM,  
436 Dalton JP and Cwiklinski K 2015. *Fasciola hepatica* vaccine: we may not be there yet but  
437 we're on the right road. Veterinary Parasitology 208, 101-111. doi:  
438 10.1016/j.vetpar.2015.01.004.

439

440 Nakov D, Hristov S, Stankovic B, Pol F, Dimitrov I, Ilieski V, Mormede P, Hervé J, Terenina  
441 E, Lieubeau B, Papanastasiou DK, Bartzanas T, Norton T, Piette D, Tullo E and van  
442 Dixhoorn IDE 2019. Methodologies for assessing disease tolerance in pigs. Frontiers in  
443 Veterinary Science 5, doi: 10.3389/fvets.2018.00329.

444

445 Råberg L, Sim D and Read AF 2007. Disentangling genetic variation for resistance and  
446 tolerance to infectious diseases in animals. Science 318, 812-814. doi:

447

448 Råberg L, Graham AL and Read AF 2009. Decomposing health: tolerance and resistance to  
449 parasites in animals. Philosophical Transactions of the Royal Society of London B 364, 37-  
450 49. doi:

451

452 Rausher MD 2001. Co-evolution and plant resistance to natural enemies. *Nature* 411, 857-  
453 864. doi:

454

455 Rauw WM, Kanis E, Noordhuizen-Stassen EN and Grommers FJ 1998. Undesirable side  
456 effects of selection for high production efficiency in farm animals: a review. *Livestock*  
457 *Production Science* 56, 15-33. doi: [http://dx.doi.org/10.1016/S0301-6226\(98\)00147-X](http://dx.doi.org/10.1016/S0301-6226(98)00147-X).

458

459 Sakkas P, Oikeh I, Blake DP, Nolan MJ, Bailey RA, Oxley A, Rychlik I, Lietz G and  
460 Kyriazakis I 2018. Does selection for growth rate in broilers affect their resistance and  
461 tolerance to *Eimeria maxima*? *Veterinary Parasitology* 258, 88-98. doi:  
462 <https://doi.org/10.1016/j.vetpar.2018.06.014>.

463

464 Sanchez-Vazquez MJ and Lewis FI 2013. Investigating the impact of fasciolosis on cattle  
465 carcass performance. *Veterinary Parasitology* 193, 307-311. doi:  
466 <https://doi.org/10.1016/j.vetpar.2012.11.030>.

467

468 Schweizer G, Braun U, Deplazes P and Torgerson PR 2005. Estimating the financial losses  
469 due to bovine fasciolosis in Switzerland. *Veterinary Record* 157, 188-193. doi:  
470 10.1136/vr.157.7.188.

471

472 Simms E 2000. Defining tolerance as a norm of reaction. *Evolutionary Ecology* 14, 563-570.  
473 doi: 10.1023/a:1010956716539.

474

475 Sternberg ED, Lefèvre T, Li J, de Castillejo CLF, Li H, Hunter MD and de Roode JC 2012.  
476 Food plant derived disease tolerance and resistance in a natural butterfly-plant-parasite  
477 interactions. *Evolution* 66, 3367-3376. doi: 10.1111/j.1558-5646.2012.01693.x.

478

479 Vale PF, McNally L, Doeschl-Wilson A, King KC, Popat R, Domingo-Sananes MR, Allen JE,

480 Soares MP and Kümmerli R 2016. Beyond killing: can we find new ways to manage

481 infection? *Evolution, Medicine, and Public Health* 2016, 148-157. doi:

482 10.1093/emph/eow012.

483

484

485

486

487

488

489

490

491

492

493

494

495

496

497

498

499

500

501

502

503

504

505 Table 1. A comparison of random regression models testing for variation in tolerance of liver  
506 fibrosis between breeds and producers, where the phenotype of interest is age at slaughter.  
507 Random effects are B = breed, P = producer, with the interaction with F = fibrosis score  
508 denoting random slopes of age at slaughter on fibrosis score. "Comparison" shows which  
509 model the model in question was tested against using a likelihood ratio test (LRT).  
510

| <b>Model</b> | <b>Random effects</b> | <b>LogLik</b> | <b>Comparison</b> | <b><math>\chi^2</math></b> | <b>DF</b> | <b>P</b> |
|--------------|-----------------------|---------------|-------------------|----------------------------|-----------|----------|
| 1            | B + P                 | -558233.7     |                   |                            |           |          |
| 2            | B*F + P               | -558232.3     | 1                 | 2.95                       | 2         | 0.229    |
| 3            | B + P*F               | -558200.9     | 1                 | 65.76                      | 2         | <0.001   |
| 4            | B*F + P*F             | -558199.5     | 2                 | 65.55                      | 2         | <0.001   |
| 4            | B*F + P*F             | -558199.5     | 3                 | 2.75                       | 2         | 0.252    |

511

512

513

514

515

516

517

518

519

520

521

522

523

524

525

526

527 Table 2. A comparison of random regression models testing for variation in tolerance of liver  
528 fibrosis between breeds and producers, with daily dead weight gain (DDWG) as the  
529 performance indicator. Random effects are B = breed, P = producer, with the interaction with  
530 F = fibrosis score denoting random slopes of DDWG on fibrosis score. "Comparison" shows  
531 which model the model in question was tested against using a likelihood ratio test (LRT).  
532

| <b>Model</b> | <b>Random effects</b> | <b>LogLik</b> | <b>Comparison</b> | <b><math>\chi^2</math></b> | <b>DF</b> | <b>P</b> |
|--------------|-----------------------|---------------|-------------------|----------------------------|-----------|----------|
| 1            | B + P                 |               |                   |                            |           |          |
| 2            | B*F + P               | 101019.8      | 1                 | 7.04                       | 2         | 0.030    |
| 3            | B + P*F               | 101023.3      | 1                 | 66.42                      | 2         | <0.001   |
| 4            | B*F + P*F             | 101053.0      | 2                 | 64.98                      | 2         | <0.001   |
| 4            | B*F + P*F             | 101055.8      | 3                 | 5.60                       | 2         | 0.061    |

533

534

535

536

537

538

539

540

541

542

543

544

545

546

547

548

549 Figure captions

550

551 Figure 1. Associations between fibrosis score and (A) age at slaughter and (B) daily dead  
552 weight gain, showing means and 95% confidence intervals estimated by linear mixed-effects  
553 effects models.

554

555 Figure 2. Tolerance variation estimated from random regression models with age at  
556 slaughter as the response variable, showing estimated slope of age at slaughter on fibrosis  
557 score for each of the (A) breeds and (C) producers, and histograms of the estimated  
558 difference in age at slaughter between animals with a fibrosis score of 0 and 3 in different (B)  
559 breeds and (D) producers. In B and D, vertical broken line shows model-estimated mean  
560 difference in age at slaughter between animals with a fibrosis score of 0 and 3.

561

562 Figure 3. Tolerance variation estimated from random regression models with daily dead  
563 weight gain (DDWG) as the response variable, showing estimated slope of DDWG on  
564 fibrosis score for each of the (A) breeds and (C) producers, and histograms of the estimated  
565 difference in DDWG between animals with a fibrosis score of 0 and 3 in different (B) breeds  
566 and (D) producers. In B and D, vertical broken line shows model-estimated mean difference  
567 in DDWG between animals with a fibrosis score of 0 and 3.

568

569

570

571

**A**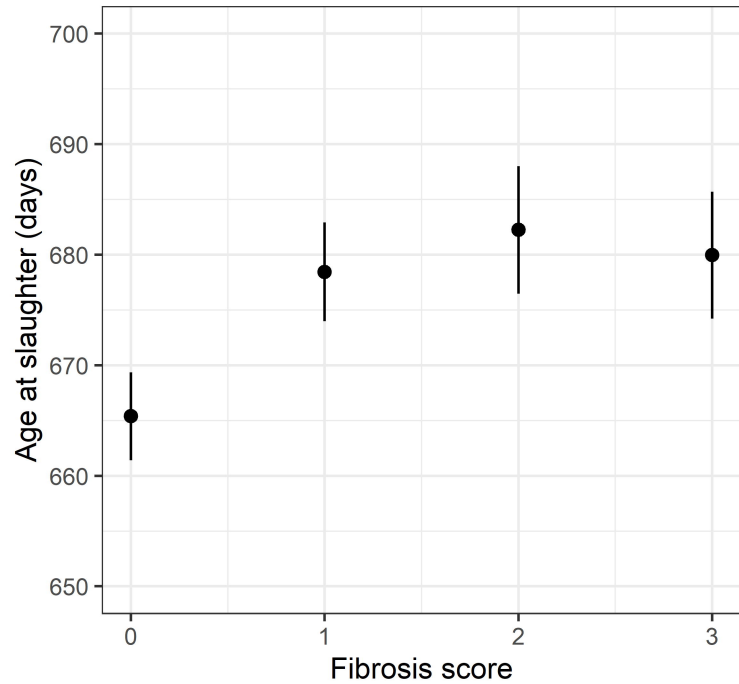**B**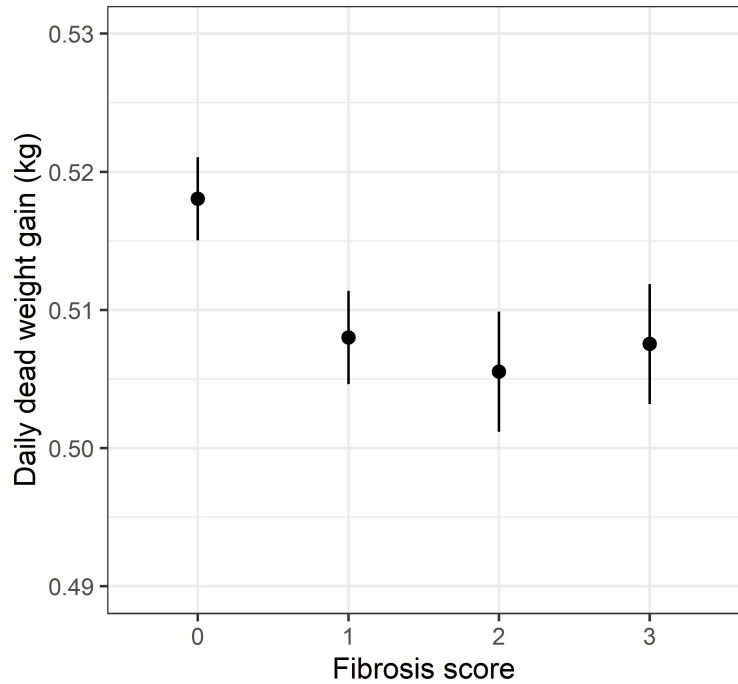



**A**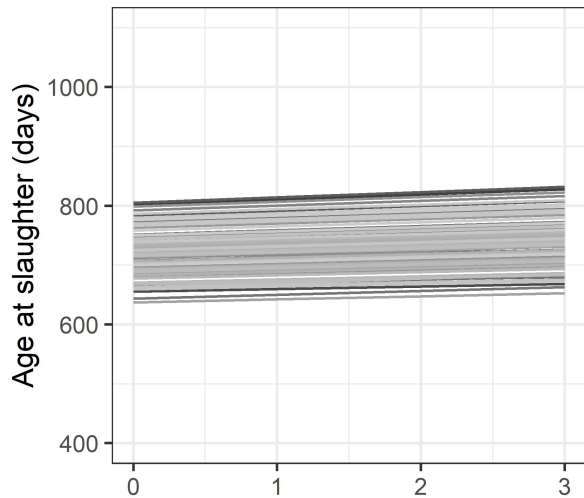**B**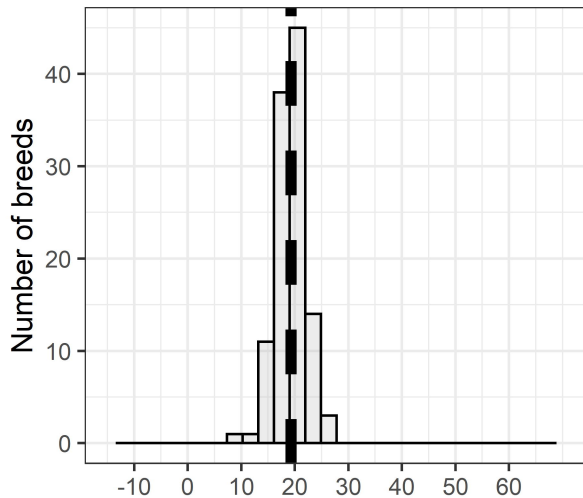**C**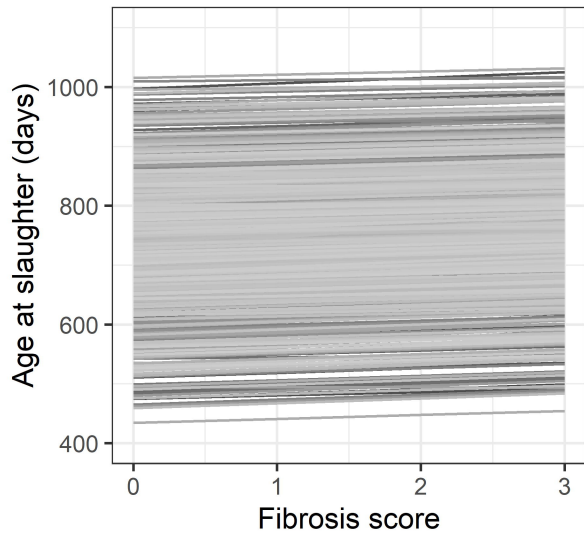**D**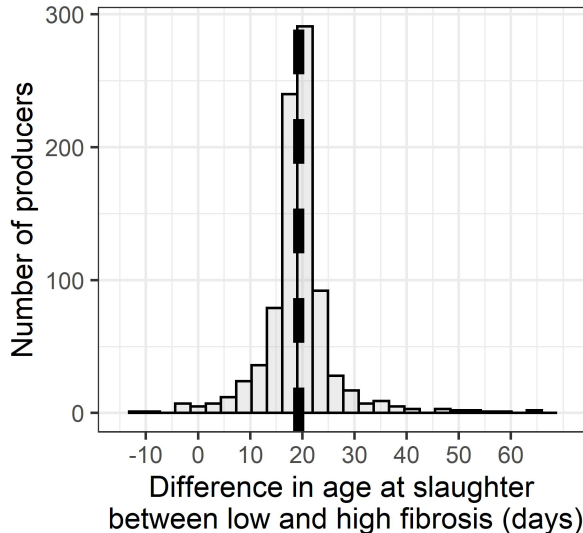

**A**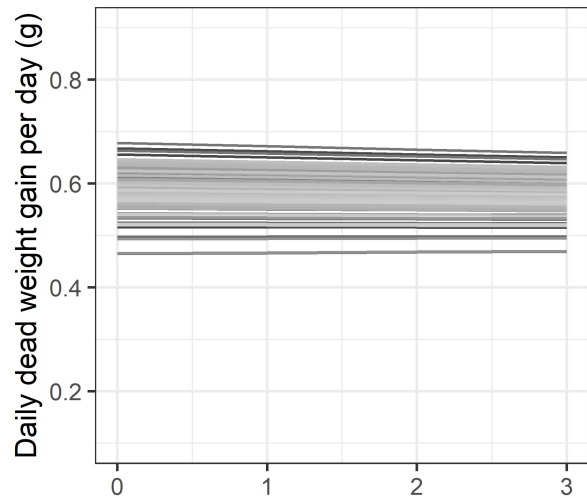**B**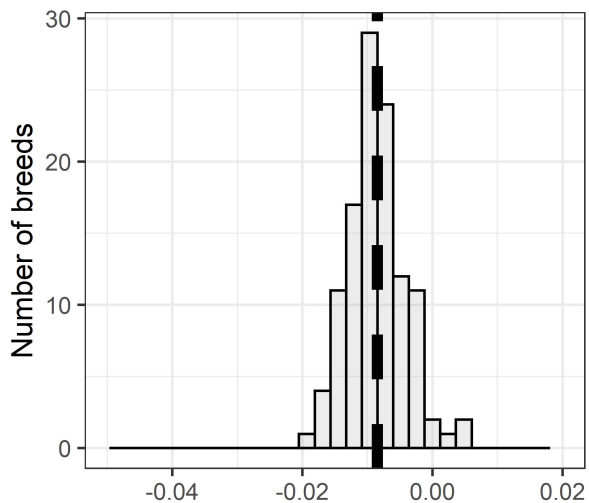**C**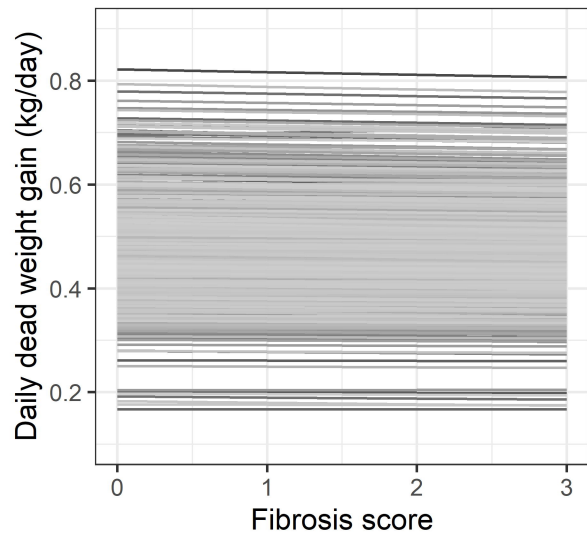**D**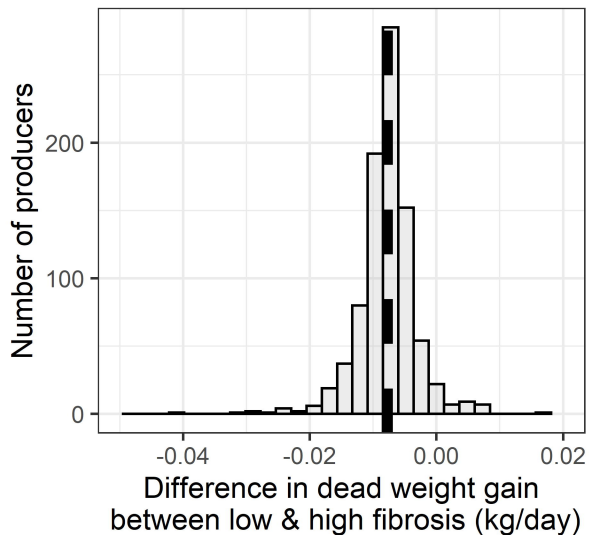

Source: https://www.biorxiv.org/content/10.1101/2020.07.29.226894v1.full.pdf
